# Supplementary material for: A urine survivin (BIRC5) bioluminescence-based immunoassay
Source: Royal Society of Chemistry journal article supplement (doi:10.1039/d5ay00599j), 2025-01-01
Supplement: d5ay00599j1.pdf [file d5ay00599j1.pdf]

# Electronic Supplementary Information

## Urine survivin (BIRC5) bioluminescence-based immunoassay

Nikita S. Panamarev<sup>a</sup>, Andrey L. Matveev<sup>b</sup>, Denis V. Chernyaev<sup>c</sup>, Ruslan A. Zukov<sup>c</sup>  
and Ludmila A. Frank<sup>a,d</sup>

<sup>a</sup>Institute of Biophysics SB RAS, Federal Center KSC SB RAS, 660036, Russia. E-mail: panamarev-n@yandex.ru  
Fax: +73912905490; Tel: +7 3912494430

<sup>b</sup>Institute of Chemical Biology and Fundamental Medicine SB RAS, Novosibirsk, 630090, Russia

<sup>c</sup>Regional Clinical Oncology Center named after A.I. Kryzhanovsky, Krasnoyarsk, 660133, Russia.

<sup>d</sup>Siberian Federal University, Krasnoyarsk, 640041, Russia

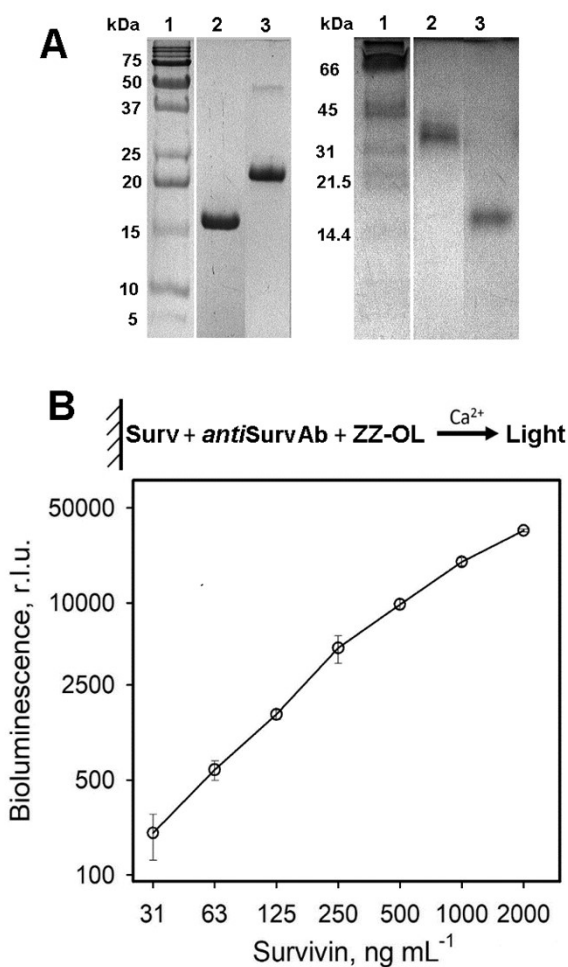

Fig. S1. A) 12.5% PAA gel electrophoresis analysis of the obtained recombinant survivin under denaturation (left) and non-denaturation conditions (right). 1 – standard proteins sample; 2 – survivin; 3 – photoprotein obelin (22.2 kDa).

B) Solid-phase bioluminescence assay of survivin (Surv) binding by *antiSurv* monoclonal antibody (*antiSurvAb*, Cloud Clone, USA). N=3.

Survivin of different concentrations (100  $\mu\text{L}$  per well, PBS, pH 7.0) was adsorbed on the plate surface. After washing and blocking (0.1 % BSA, the same buffer), the solution of *antiSurvAb* (100  $\mu\text{L}$  per well, 3  $\mu\text{g mL}^{-1}$  PBS, pH 7.0) was placed into the wells, incubated for 1 h at room temperature, then washed. The solution of hybrid protein ZZ with photoprotein obelin (ZZ-OL)<sup>1</sup> in 20 mmol L<sup>-1</sup> TrisHCl pH 7.0, 5 mmol L<sup>-1</sup> was placed into the wells, incubated for 1h and washed thereafter. Bioluminescence of the complexes, formed on the surface was measured right after CaCl<sub>2</sub> addition (0.1 mol L<sup>-1</sup>, 50 mol L<sup>-1</sup> Tris HCl, pH 8.8).

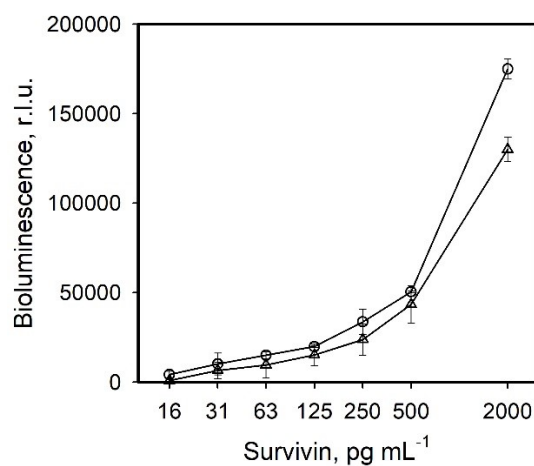

Fig. S2. Microtiter-based sandwich-type bioluminescent immunoassay of survivin in the standard samples of urine (-Δ-, calibrator diluent RD5-33, R&D Systems, USA), or in the urine of healthy patient (-○-), performed with *antiSurvAb-NLuc*. Each point is the average  $\pm 1$  SD ( $n = 3$ ).

## Reference

1. V. V. Krasitskaya, E. E. Bashmakova, A. N. Kudryavtsev, M. A. Vorobyeva, E. A. Shatunova, L. A. Frank. The hybrid protein ZZ-OL as an analytical tool for biotechnology research. *Rus. J. Bioorgan. Chem.*, 2020, 46(6), 1004–1010.
